# Supplementary material for: Cyanostilben-based derivatives: mechanical stimuli-responsive luminophors with aggregation-induced emission enhancement
Source: Royal Society of Chemistry journal article supplement (doi:10.1039/c2pp05404c), 2012-06-22
Supplement: c2pp05404c.pdf [file c2pp05404c.pdf]

## Cyanostilben-Based Derivatives: Mechanical Stimuli-Responsive Luminophors with Aggregation-Induced Emission Enhancement

Yujian Zhang,<sup>a</sup> Jingwei Sun,<sup>a</sup> Gaofeng Bian,<sup>a,b</sup> Yiyi Chen,<sup>a</sup> Mi Ouyang,<sup>\*a</sup>  
Bin Hu,<sup>a</sup> and Cheng Zhang<sup>\*a</sup>

<sup>a</sup> State Key Laboratory Breeding Base of Green Chemistry-Synthesis Technology, College of Chemical Engineering and Materials Science, Zhejiang University of Technology, HangZhou, PR China. Fax/Tel: +86 579 88320027;

\*E-mail: [czhang@zjut.edu.cn](mailto:czhang@zjut.edu.cn) (C.Zhang); E-mail: [ouyang@zjut.edu.cn](mailto:ouyang@zjut.edu.cn) (M. Ouyang)

<sup>b</sup> Key Laboratory of Organosilicon Chemistry and Material Technology Ministry of Education, Hangzhou Normal University, PR China.

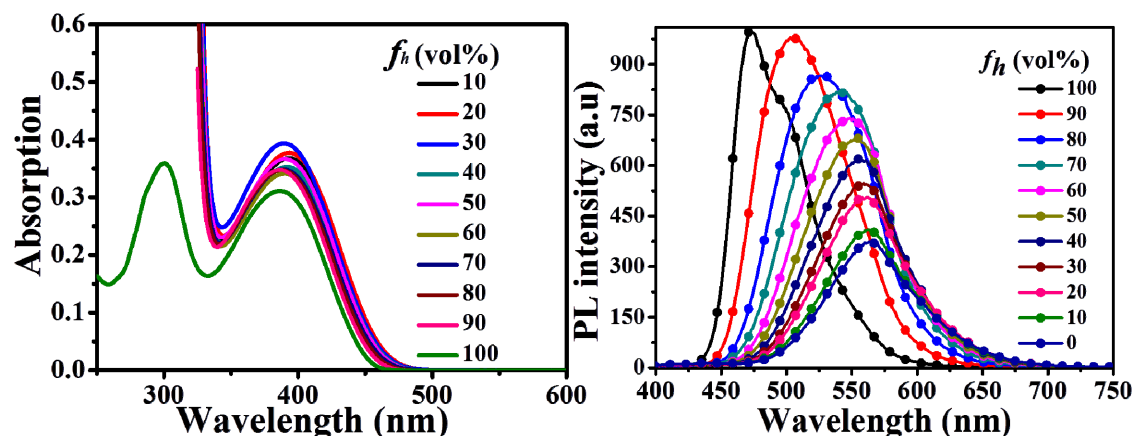

Fig.S1 The absorption spectra of CNS-4 in *n*-hexane/acetone mixtures with different fractions of hexane ( $f_h$ ), solution concentration:  $10\mu\text{M}$

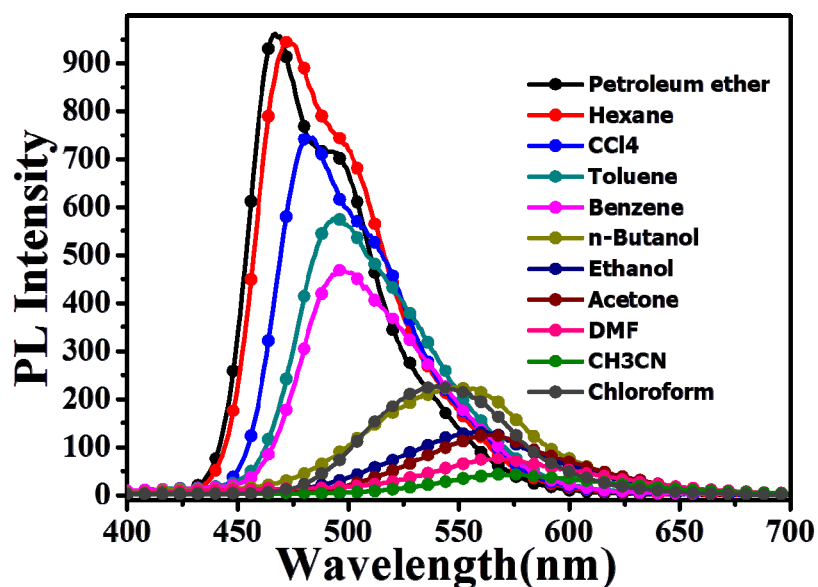

Fig.S2 The emission spectra of solutions of CNS-4 in solvents with different polarities ( $A_f$ ), solution concentration:  $10\mu\text{M}$ , solutions were excited at 400 nm.

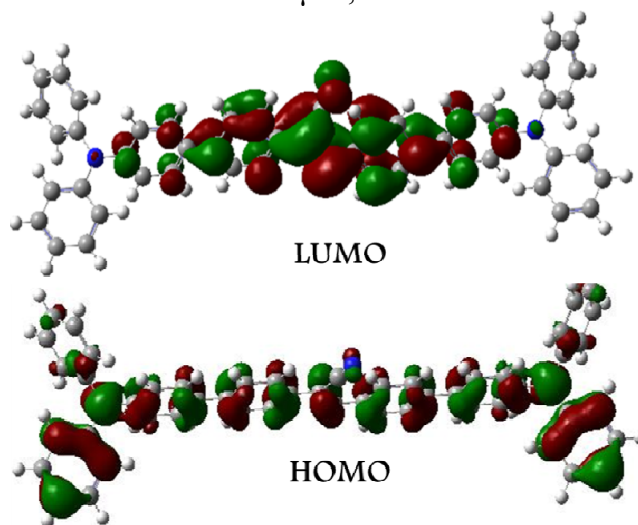

Fig.S3 Pictorial representations of Frontier molecular orbitals calculated at B3LYP/3-21G for compounds CNS-4

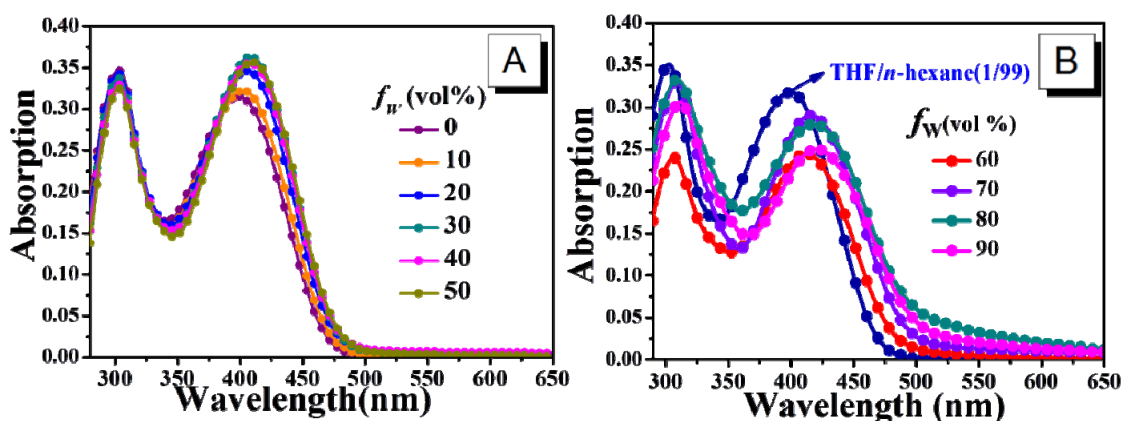

Fig.S4 The absorption spectra of CNS-4 in THF/water mixtures with different fractions of water ( $f_w$ ), Solution concentration: 10 $\mu$ M

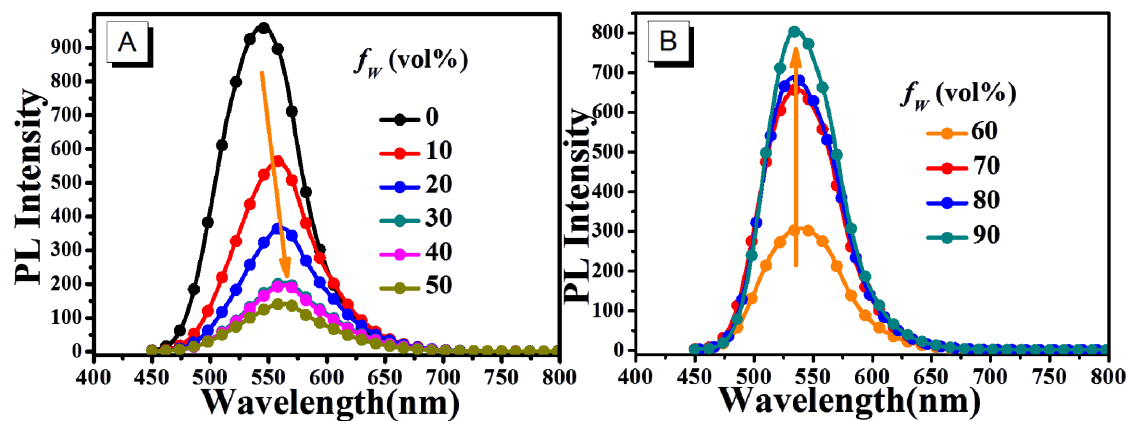

Fig.S5 The emission spectra of CNS-4 in THF/water mixtures with different fractions of water ( $f_w$ ). Excitation wavelength: 435 nm, Solution concentration: 10 $\mu$ M.

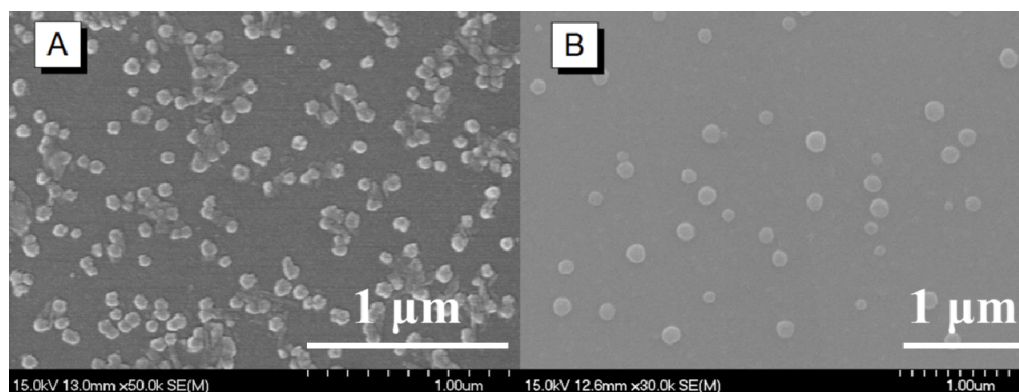

Fig.S6 SEM images of the spherical nanostructures prepared from (a) THF/H<sub>2</sub>O (4:6) and (b) THF/H<sub>2</sub>O (2:8) mixtures of luminophor CNS-4 after a mixing time of 3 day, Solution concentration: 10  $\mu$ M.

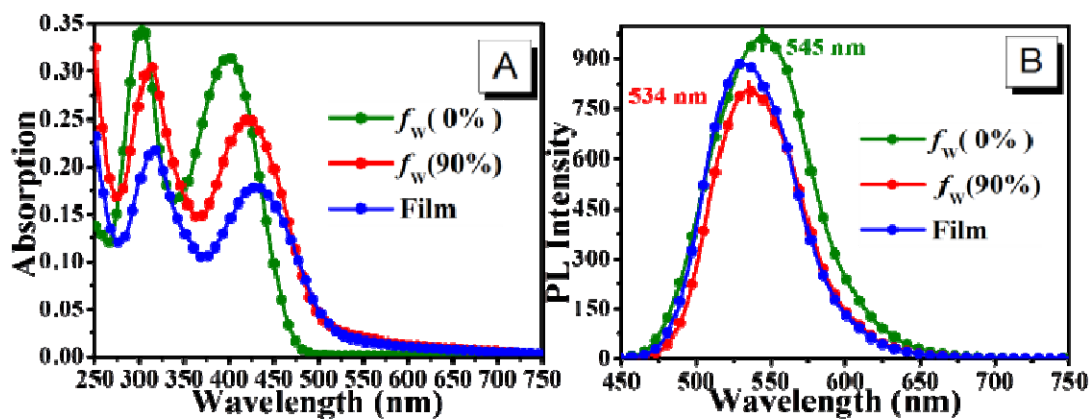

Fig.S7 a) Absorption and b) emission spectra of CNS-4 respectively in the different states, solution concentration: 10  $\mu$ M.

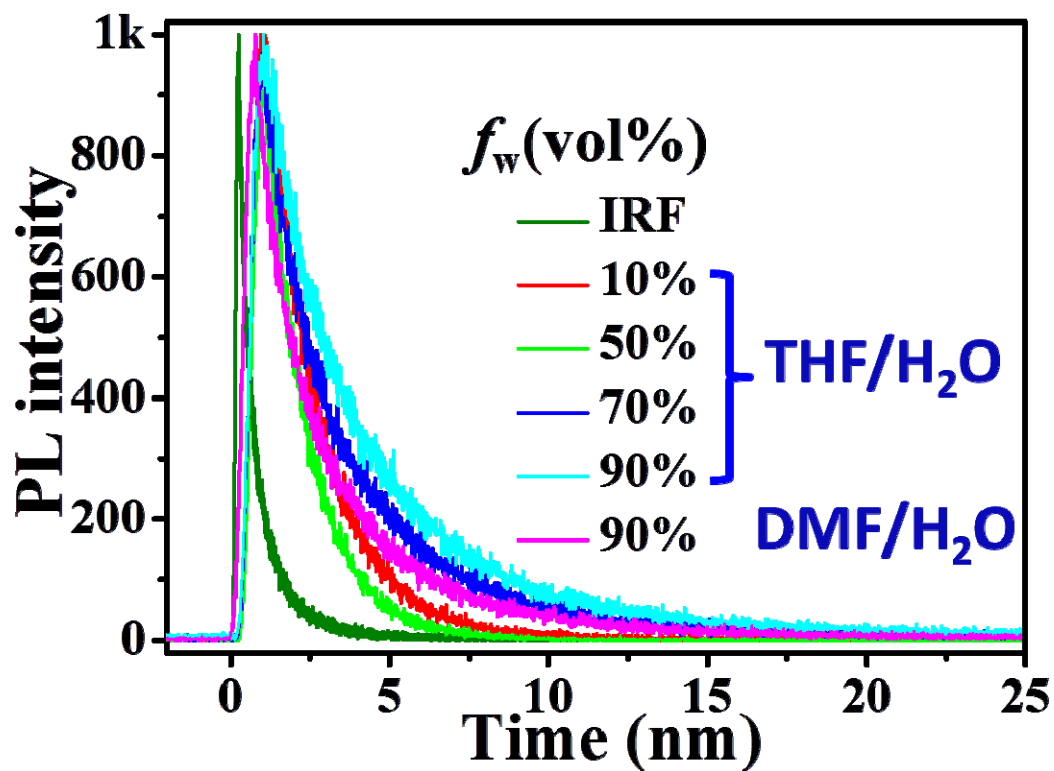

Fig.S8 Fluorescence decay profiles of CNS-4 in the different mixtures

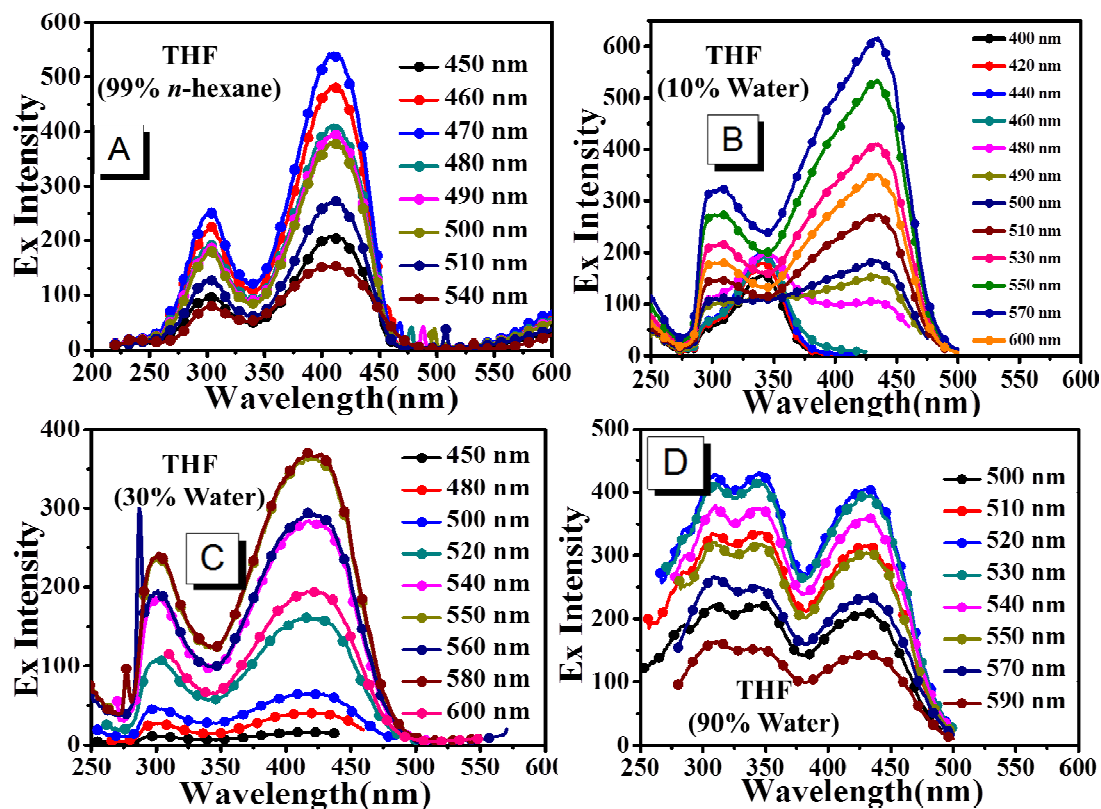

**Fig.S9** Dependence of excitation spectra as function of emission wavelength for CNS-4 in a) THF/n-hexane mixture with  $f_H=99\%$  and THF/water mixture with  $f_W$  b) 10%, c) 30% and d) 90%.

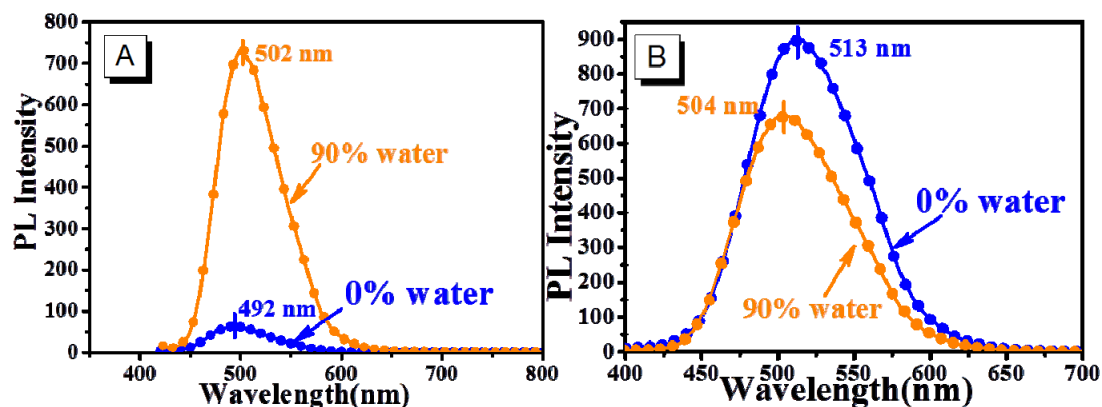

**Fig.S10** Fluorescence spectra of CNS-2(A) and CNS-3(B) in the THF/water with 0% and 90% water fraction, Solution concentration: 10  $\mu$ M.

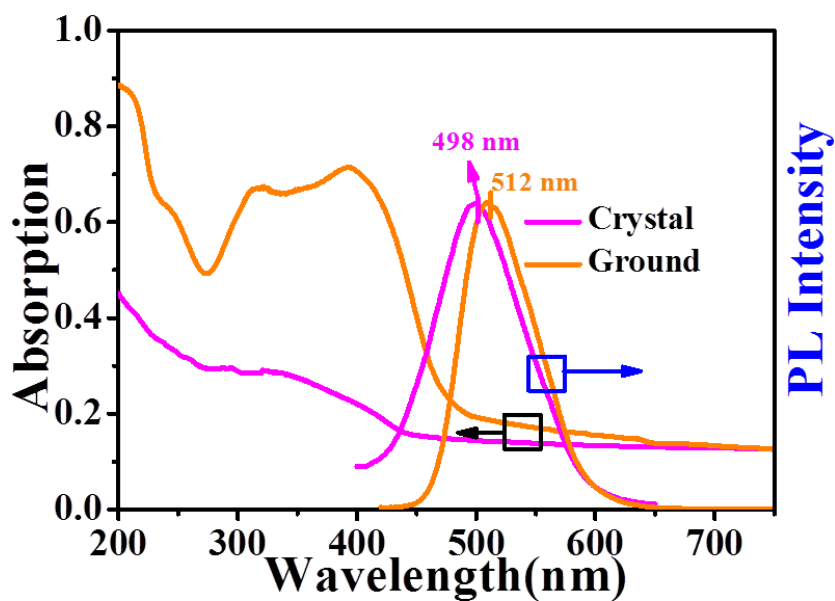

Fig.11 the absorption and PL spectra of compound CNS-3 in the different state.

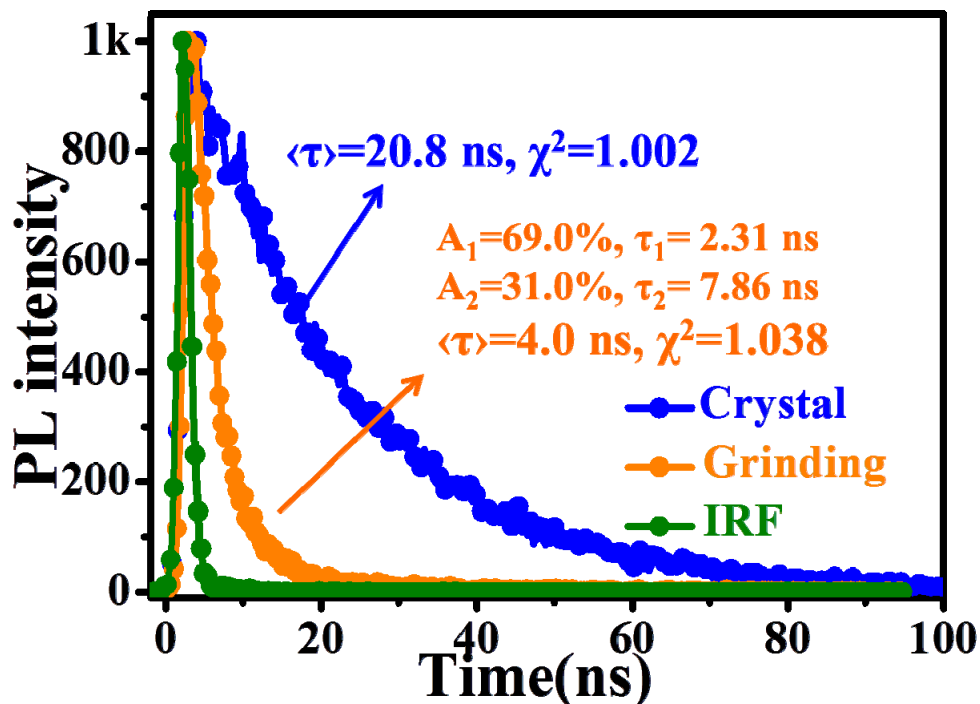

Fig.S12 Fluorescence decay profiles of CNS-3 in the different state
